# Supplementary material for: A Preliminary Study on the Mechanisms of Growth and Physiological Changes in Response to Different Temperatures in Neopyropia yezoensis (Rhodophyta)
Source: MDPI journal article supplement (doi:10.3390/w14142175), 2022-07-09
Supplement: s1 [file s1]

Archive with 1 entries (1 files):
- water-1741117-supplementary.pdf
