# Supplementary material for: A Preliminary Study on the Mechanisms of Growth and Physiological Changes in Response to Different Temperatures in Neopyropia yezoensis (Rhodophyta)
Source: MDPI journal article supplement (doi:10.3390/w14142175), 2022-07-09
Supplement: s1 [file s1 › water-1741117-supplementary.pdf]

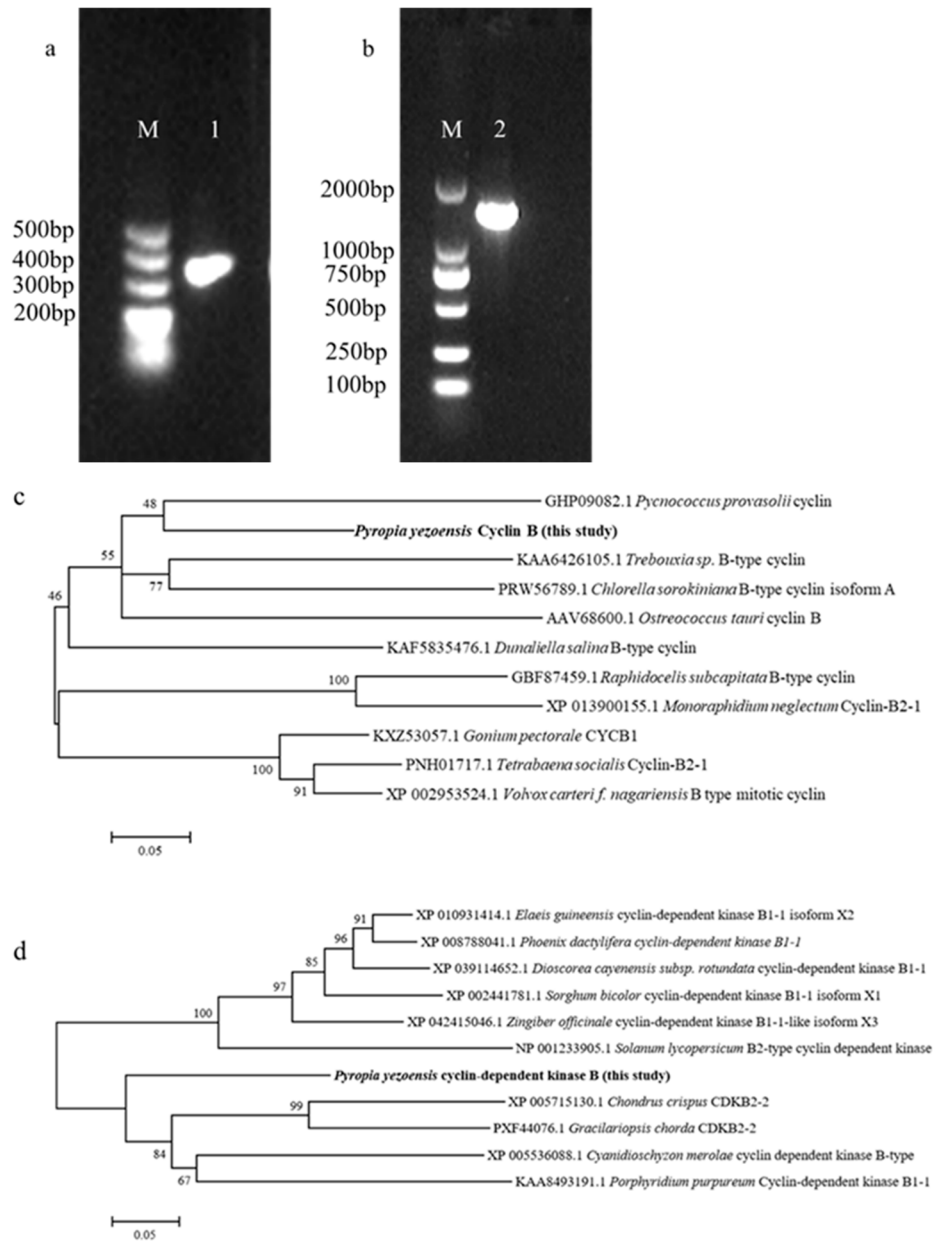

**Figure S1.** *N. yezoensis* Cyclin B and CDKB sequence analyses (a,b) and phylogenetic trees (c,d). (a): DL500 marker (M) and the amplification of the partial coding sequence fragments of Cyclin B (1); (b): DL2000 marker (M) and the amplification of the complete CDKB (2); (c,d): the phylogenetic trees of Cyclin B and CDKB.
